# Supplementary material
Source: PubMed Central journal article supplement (PMC4902624)
Supplement: supp_pp.16.00450_PP2016-00450R1_Supplemental_Material.pdf [file supp_pp.16.00450_PP2016-00450R1_Supplemental_Material.pdf]

1 **Supplemental Table 1.** Nomenclature and description of the *ski3* alleles.

2

| <i>ski3</i> allele | Alternate name | Ecotype    | Mutagen | Description of mutation                                                                                                       | Reference                    |
|--------------------|----------------|------------|---------|-------------------------------------------------------------------------------------------------------------------------------|------------------------------|
| <i>ski3-1</i>      | <i>s37</i>     | Col        | EMS     | Nonsense, Gln to STOP at amino acid 20                                                                                        | Zhang et al., 2015           |
| <i>ski3-2</i>      | <i>s40</i>     | Col        | EMS     | Nonsense, Trp to STOP at amino acid 158                                                                                       | Zhang et al., 2015           |
| <i>ski3-3</i>      |                | Col        | EMS     | Nonsense, Trp to STOP at amino acid 240                                                                                       | Yu et al., 2015              |
| <i>ski3-4</i>      | FLAG 303H02    | Col        | T-DNA   |                                                                                                                               | Yu et al., 2015              |
| <i>ski3-5</i>      | GABI 140B07    | Col        | T-DNA   | Insertion in 11 <sup>th</sup> exon                                                                                            | Yu et al., 2015<br>This work |
| <i>ski3-6</i>      | GABI 007D02    | Col        | T-DNA   |                                                                                                                               | Yu et al., 2015              |
| <i>ski3-7</i>      | SALK_099525    | Col        | T-DNA   | Insertion in 19 <sup>th</sup> exon                                                                                            | Yu et al., 2015<br>This work |
| <i>ski3-8</i>      | <i>war1-1</i>  | <i>Ler</i> | EMS     | G->A mutation in first intron at nucleotide 148 from ATG                                                                      | This work                    |
| <i>ski3-9</i>      | <i>war1-2</i>  | <i>Ler</i> | EMS     | C deletion in 9 <sup>th</sup> exon at nucleotide 1952, causing Ser to Phe at amino acid 410 and Leu to STOP at amino acid 411 | This work                    |
| <i>ski3-10</i>     | <i>war1-3</i>  | <i>Ler</i> | EMS     | Nonsense, Gln to STOP at amino acid 131                                                                                       | This work                    |

3

4

5 **Supplemental Table 2.** Nomenclature and description of the *ski2* alleles.

6

| <i>ski2</i> allele | Alternate name | Ecotype    | Mutagen | Description of mutation                                             | Reference                       |
|--------------------|----------------|------------|---------|---------------------------------------------------------------------|---------------------------------|
| <i>ski2-1</i>      | <i>s28</i>     | Col        | EMS     | Missense, Thr to Ile at amino acid 389                              | Zhang et al., 2015              |
| <i>ski2-2</i>      | SALK_129982    | Col        | T-DNA   | Insertion in 19 <sup>th</sup> exon                                  | Zhang et al., 2015              |
| <i>ski2-3</i>      | SALK_063541    | Col        | T-DNA   | Insertion in 23 <sup>rd</sup> exon                                  | Zhang et al., 2015<br>This work |
| <i>ski2-4</i>      | SALK_118579    | Col        | T-DNA   | Insertion in 9 <sup>th</sup> exon                                   | Dorcey et al., 2012             |
| <i>ski2-5</i>      | SALK_141579    | Col        | T-DNA   | Insertion in 3 <sup>rd</sup> intron                                 | This work                       |
| <i>ski2-6</i>      | SALK_122393    | Col        | T-DNA   | Insertion in 23 <sup>rd</sup> exon                                  | This work                       |
| <i>ski2-7</i>      | <i>war7-1</i>  | <i>Ler</i> | EMS     | Nonsense, Arg to STOP at amino acid 1297                            | This work                       |
| <i>ski2-8</i>      | <i>war7-2</i>  | <i>Ler</i> | EMS     | g->a change at 8 <sup>th</sup> exon/8 <sup>th</sup> intron junction | This work                       |
| <i>ski2-9</i>      | <i>war7-3</i>  | <i>Ler</i> | EMS     | Nonsense, Gln to STOP at amino acid 418                             | This work                       |

7 **Supplemental Table 3.** Nomenclature and description of the *ski8* alleles.

8

| <i>ski8</i> allele | Alternate name               | Ecotype | Mutagen                   | Description of mutation                    | Reference                |
|--------------------|------------------------------|---------|---------------------------|--------------------------------------------|--------------------------|
| <i>ski8-1</i>      | <i>vip3-1</i>                | Ler     | T-DNA                     | Insertion in second exon                   | Zhang et al., 2003       |
| <i>ski8-2</i>      | <i>vip3-2</i><br>SALK_083364 | Col     | T-DNA                     | Insertion in first exon                    | Jolivet et al., 2006     |
| <i>ski8-3</i>      | <i>vip3-3</i><br>SALK_117732 | Col     | T-DNA                     | Insertion in second exon                   | Jolivet et al., 2006     |
| <i>ski8-4</i>      | <i>vip3<sup>zwg</sup></i>    | Sav-0   | Natural genetic variation | Deletion of nucleotides 861-867 of the ORF | Dorcey et al., 2012      |
| <i>ski8-5</i>      | <i>boq-1</i>                 | Col     | EMS                       | Nonsense, Gly to Glu at amino acid 219     | Takagi and Ueguchi, 2012 |
| <i>ski8-6</i>      | SALK_060207                  | Col     | T-DNA                     | Insertion in first exon                    | This work                |
| <i>ski8-7</i>      | SALK_139885                  | Col     | T-DNA                     | Insertion in second exon                   | This work                |

9

10

11 **Supplemental Table 4.** Cuticular wax composition of inflorescence stems of Arabidopsis wild type (WT), *cer7*,  
 12 suppressors and double mutants. Mean values ( $\mu\text{gcm}^{-2}$ ) of total wax loads and coverage of individual  
 13 compound classes are given with SD ( $n=3$ ).

| Genotype            | Total Load | Fatty acids | Aldehydes | Alkanes  | Secondary alcohols | Ketones | Primary Alcohols | Esters  |
|---------------------|------------|-------------|-----------|----------|--------------------|---------|------------------|---------|
| Ler WT              | 20.0±0.3   | 0.1±0.0     | 1.0±0.0   | 8.9±0.2  | 2.6±0.1            | 6.4±0.2 | 0.5±0.2          | 0.4±0.0 |
| <i>cer7-1</i>       | 4.2±0.3    | 0.1±0.1     | 0.2±0.0   | 0.1±0.2  | 0.2±0.0            | 1.2±0.1 | 1.1±0.3          | 0.3±0.0 |
| <i>war1-1cer7-1</i> | 15.0±1.2   | 0.1±0.0     | 0.2±0.0   | 6.1±0.7  | 1.4±0.1            | 4.9±0.4 | 1.9±0.1          | 0.5±0.0 |
| <i>war1-2cer7-1</i> | 14.8±0.9   | 0.1±0.0     | 0.4±0.1   | 7.1±0.5  | 1.6±0.1            | 4.6±0.5 | 0.6±0.2          | 0.4±0.1 |
| <i>war1-3cer7-1</i> | 19.6±1.9   | 0.1±0.0     | 0.8±0.1   | 8.9±1.0  | 2.4±0.1            | 6.6±0.9 | 0.4±0.1          | 0.4±0.0 |
| <i>war7-1cer7-1</i> | 23.4±1.4   | 0.2±0.0     | 1.2±0.3   | 13.6±0.9 | 2.1±0.2            | 4.6±0.2 | 1.1±0.1          | 0.7±0.0 |
| <i>war7-2cer7-1</i> | 16.1±0.8   | 0.2±0.0     | 0.7±0.0   | 7.3±0.5  | 2.0±0.2            | 4.6±0.3 | 1.0±0.1          | 0.2±0.0 |
| <i>war7-3cer7-1</i> | 19.2±1.0   | 0.2±0.0     | 0.6±0.0   | 7.7±0.4  | 2.0±0.3            | 6.5±0.3 | 1.7±0.1          | 0.4±0.0 |
| Col 0 WT            | 22.6±0.8   | 0.1±0.0     | 0.9±0.1   | 10.3±0.1 | 2.0±0.2            | 6.7±0.3 | 1.7±0.3          | 0.7±0.0 |
| <i>wer7-3</i>       | 8.0±0.8    | 0.1±0.0     | 0.3±0.1   | 2.4±0.3  | 0.5±0.1            | 2.0±0.2 | 2.4±0.2          | 0.4±0.0 |
| <i>ski3-5cer7-3</i> | 15.1±0.8   | 0.2±0.0     | 0.6±0.1   | 5.9±0.5  | 1.3±0.2            | 4.3±0.2 | 2.2±0.2          | 0.6±0.0 |
| <i>ski3-7cer7-3</i> | 15.8±1.7   | 0.3±0.0     | 0.6±0.1   | 6.7±1.1  | 1.2±0.4            | 4.1±0.6 | 2.2±0.3          | 0.5±0.0 |
| <i>ski2-5cer7-3</i> | 12.9±1.1   | 0.2±0.0     | 0.4±0.0   | 5.0±0.6  | 1.0±0.2            | 3.4±0.3 | 2.3±0.1          | 0.5±0.0 |
| <i>ski2-6cer7-3</i> | 18.1±2.2   | 0.2±0.0     | 0.6±0.1   | 7.6±1.1  | 1.7±0.3            | 5.1±0.6 | 2.3±0.3          | 0.6±0.0 |
| <i>ski2-3cer7-3</i> | 16.7±1.3   | 0.2±0.0     | 0.5±0.1   | 7.2±0.6  | 1.4±0.2            | 4.6±0.3 | 2.3±0.3          | 0.6±0.0 |
| <i>ski8-6cer7-3</i> | 14.4±2.1   | 0.2±0.0     | 0.5±0.1   | 5.9±1.0  | 1.4±0.3            | 3.8±0.6 | 2.2±0.1          | 0.5±0.0 |
| <i>ski8-7cer7-3</i> | 14.3±0.5   | 0.1±0.0     | 0.7±0.1   | 6.3±0.2  | 1.8±0.1            | 3.6±0.2 | 1.3±0.4          | 0.5±0.0 |

14

15

16

17

18 **Supplemental Table 5.** Primers used in this study.

| <b>Primer</b>       | <b>Sequence (5' to 3')</b>                                  |
|---------------------|-------------------------------------------------------------|
| Lb1.3               | ATTTTGCCGATTCGGAAC                                          |
| GABI_140B07 LP      | CATTTTGTCTTTCTGGCTTCG                                       |
| GABI_140B07 RP      | CATCAAGCAAACCTTTTGGAG                                       |
| SALK_099525 LP      | CTCCGACAAGAAGGATCAGTG                                       |
| SALK_099525 RP      | CACGTGAGCAGAGATTCCTC                                        |
| SALK_141579 LP      | ATTTTGATTGGTTTTCCAGGG                                       |
| SALK_141579 RP      | GACTTCATTGCTTATGCTCGC                                       |
| SALK_122393 LP      | TTTCTCATTTGAACGTACCCG                                       |
| SALK_122393 RP      | CGCCAAGCTTTTTGTAGTCTC                                       |
| SALK_063541 LP      | TTTCGGTGTGAAGAGTCGTC                                        |
| SALK_063541 RP      | TCGATCACTCTGTCCCTTC                                         |
| SALK_060207 LP      | GAACAGCTTCAACGCAAGTTC                                       |
| SALK_060207 RP      | AAGGAGGAGCTTCCAAAACAG                                       |
| SALK_139885 LP      | GACTGCAAGTACCACTTTCGC                                       |
| SALK_139885 RP      | TAATGGGAAACGACTTGCTTG                                       |
| o8409               | ATATTGACCATCATACTCATTGC                                     |
| AtSKI3RT-F          | GTTC AAGCGAGTTCATTGTTTC                                     |
| AtSKI3RT-R          | GTCTTGCGAGTATATGCATCTG                                      |
| AtSKI2RT-F          | GGTGAACCTCAAGCTCAGTAC                                       |
| AtSKI2RT-R          | CAATCTCACAATGGTTCGAACT                                      |
| AtSKI8RT-F          | TCGATTGATAGCTTTGTCCGTG                                      |
| AtSKI8RT-R          | ATCTCCAGCTTGCAGTGCC                                         |
| ACTIN2-F            | TCCCTCAGCACATTCCAGCAGAT                                     |
| ACTIN2-R            | AACGATTCCTGGACCTGCCTCATC                                    |
| CER3-qPCR-F         | CTCATCTCCTGTTCCACATCC                                       |
| CER3-qPCR-R         | TCAATGGAACACCAGCTACG                                        |
| AtSKI3p-attB1       | GGGGACAAGTTTGTACAAAAAAGCAGGCTGATG<br>CAAGGAAAATTGCTG        |
| AtSKI3-attB2-noSTOP | GGGGACCACTTTGTACAAGAAAGCTGGGTCGCT<br>CATGGGATGTTGAACA       |
| ScSKI3-attB1        | GGGGACAAGTTTGTACAAAAAAGCAGGCTTCAT<br>GTCGGATATTAACAGCTATTGA |
| ScSKI3-attB2        | GGGGACCACTTTGTACAAGAAAGCTGGGCTTAG<br>AAACATTCGTTTAGCGCCTT   |
| AtSKI3p-attB4       | GGGGCAACTTTGTATAGAAAAGTTGGATGCAAGG<br>AAAATTGCTG            |
| AtSKI3p-attB1R      | GGGGCTGCTTTTTTGTACAACTTGCTGAATATAA<br>CCCAATCTACAAAATG      |
| AtSKI3-F            | AAACACGAAGACCAGAGGAAATATGGAATTAGA<br>GCAGCTTAAGAA           |
| AtSKI3-R            | GCTCTAGATCAGCTCATGGGATGTTGAAC                               |

|                     |                                                            |
|---------------------|------------------------------------------------------------|
| ScSKI3p-F           | TCCCCCGGAAGCTTACACCTTCTTCTCAA                              |
| ScSKI3p-R           | TTCTTAAGCTGCTCTAATTCATATTCCTCTGCTCT<br>TCGTGTTT            |
| ScSKI3t-F           | GCTCTAGAAAATTTGGATTCAGAATAGTCAAT                           |
| ScSKI3t-R           | CCCAAGCTTGATCCCGGCGCTACCTGC                                |
| AtSKI2p-attB1       | GGGGACAAGTTTGTACAAAAAGCAGGCTGATG<br>CAAGGAAAATTGCTG        |
| AtSKI2-attB2-noSTOP | GGGGACCACTTTGTACAAGAAAGCTGGGTCGCTC<br>ATGGGATGTTGAACA      |
| ScSKI2-attB1        | GGGGACAAGTTTGTACAAAAAGCAGGCTTCATG<br>TCGGATATTAACAGCTATTGA |
| ScSKI2-attB2        | GGGGACCACTTTGTACAAGAAAGCTGGGTCTTAG<br>AAACATTCGTTTAGCGCCTT |
| AtSKI2p-attB4       | GGGGCAACTTTGTATAGAAAAGTTGGATGCAAGG<br>AAAATTGCTG           |
| AtSKI2p-attB1R      | GGGGCTGCTTTTTGTACAACTTGCTGAATATAA<br>CCCAATCTACAAAATG      |
| AtSKI2-F            | AAACACGAAGACCAGAGGAAATATGGAATTAGAG<br>CAGCTTAAGAA          |
| AtSKI2-R            | GCTCTAGATCAGCTCATGGGATGTTGAAC                              |
| ScSKI2p-F           | TCCCCCGGAAGCTTACACCTTCTTCTCAA                              |
| ScSKI2p-R           | TTCTTAAGCTGCTCTAATTCATATTCCTCTGCTCT<br>TCGTGTTT            |
| ScSKI2t-F           | GCTCTAGAAAATTTGGATTCAGAATAGTCAAT                           |
| ScSKI2t-R           | CCCAAGCTTGATCCCGGCGCTACCTGC                                |

19  
20  
21  
22  
23  
24  
25  
26  
27  
28  
29  
30  
31  
32
